# Supplementary material for: Combined CDK2 and CDK4/6 Inhibition Overcomes Palbociclib Resistance in Breast Cancer by Enhancing Senescence
Source: MDPI journal article supplement (doi:10.3390/cancers12123566), 2020-11-29

Figure2  
A.

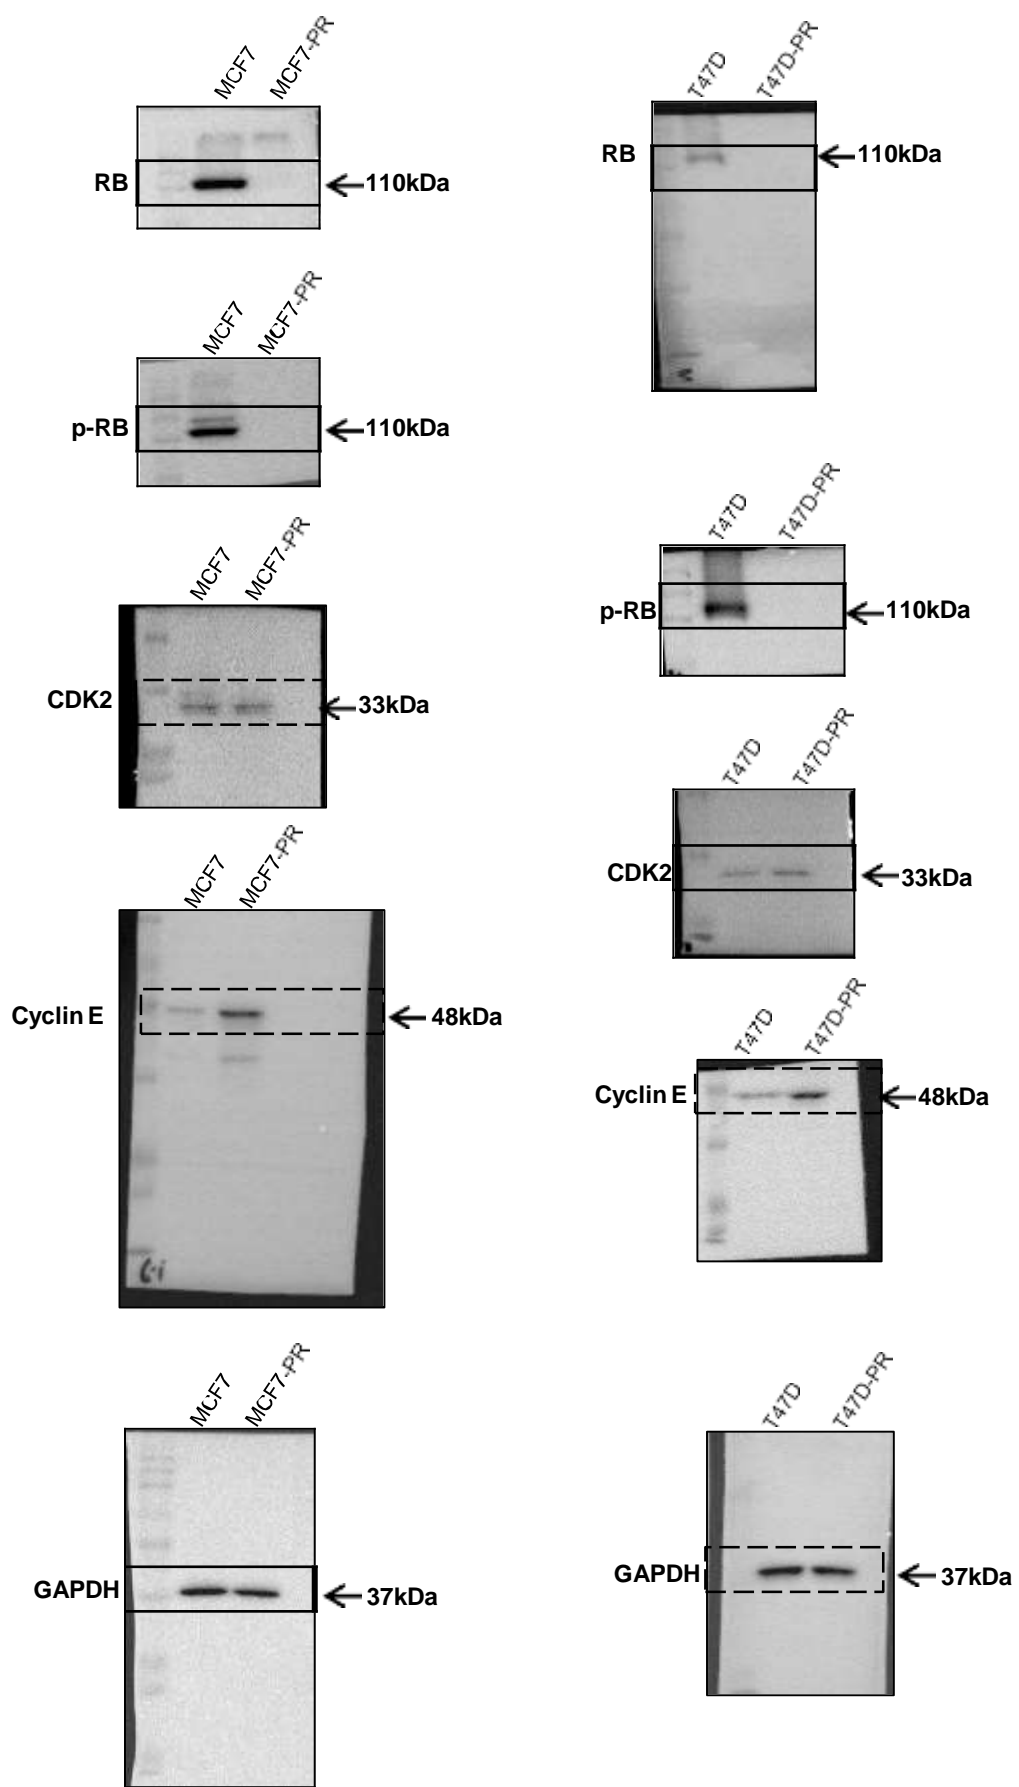

Figure 3

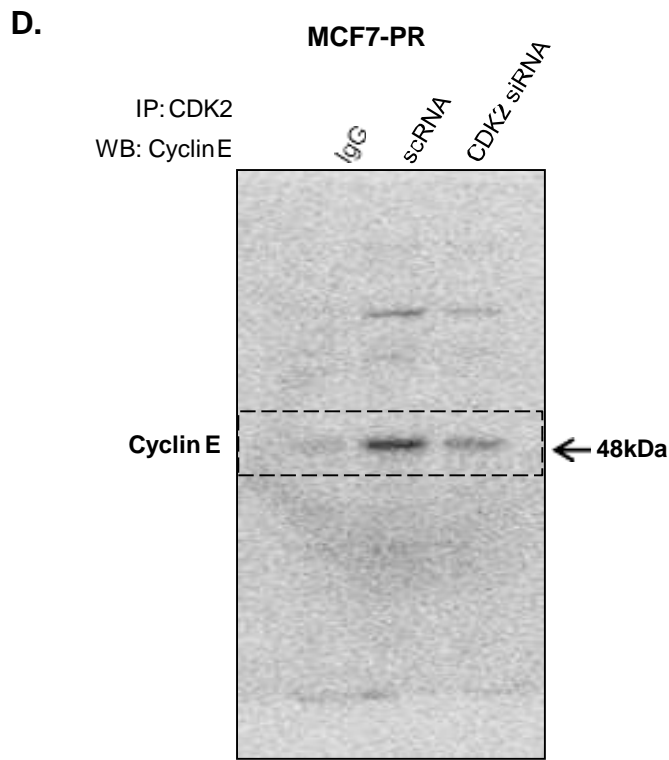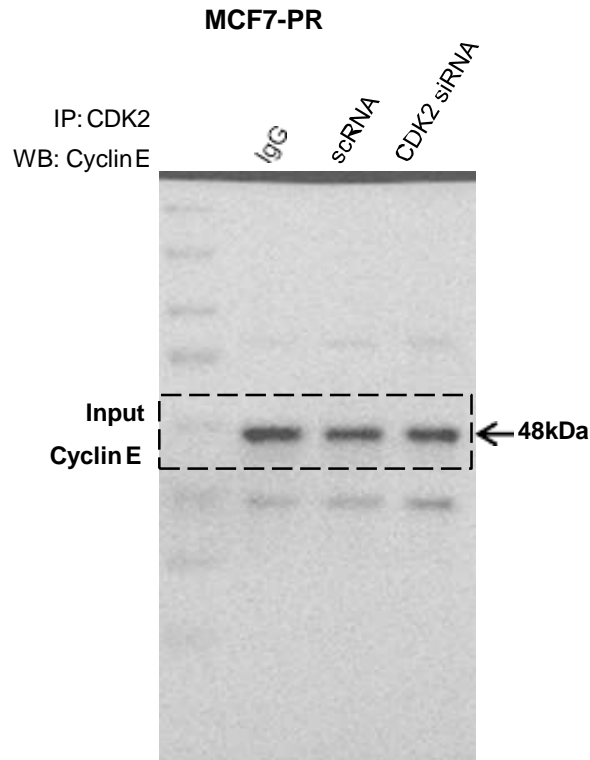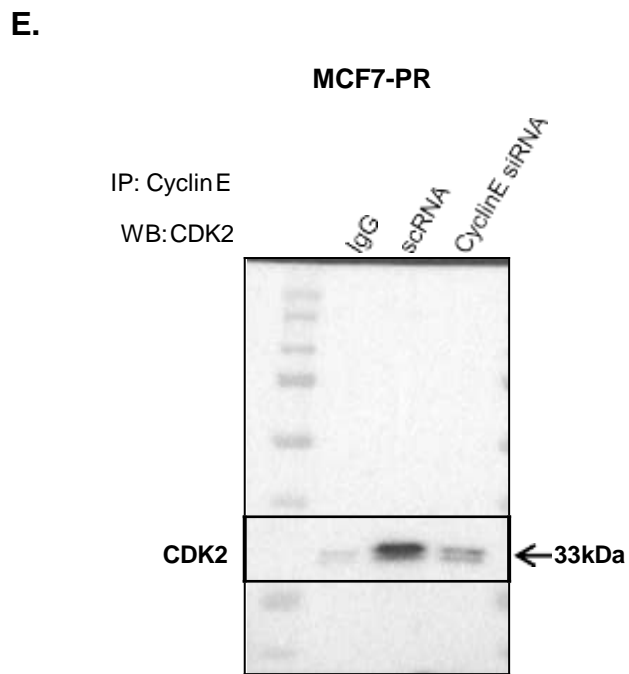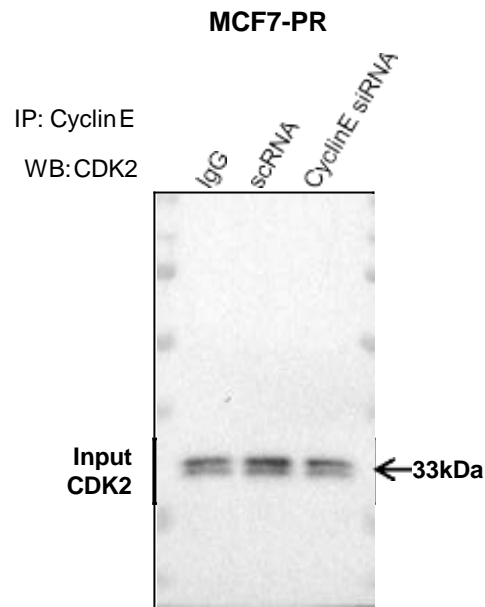

Figure 5

**B.**

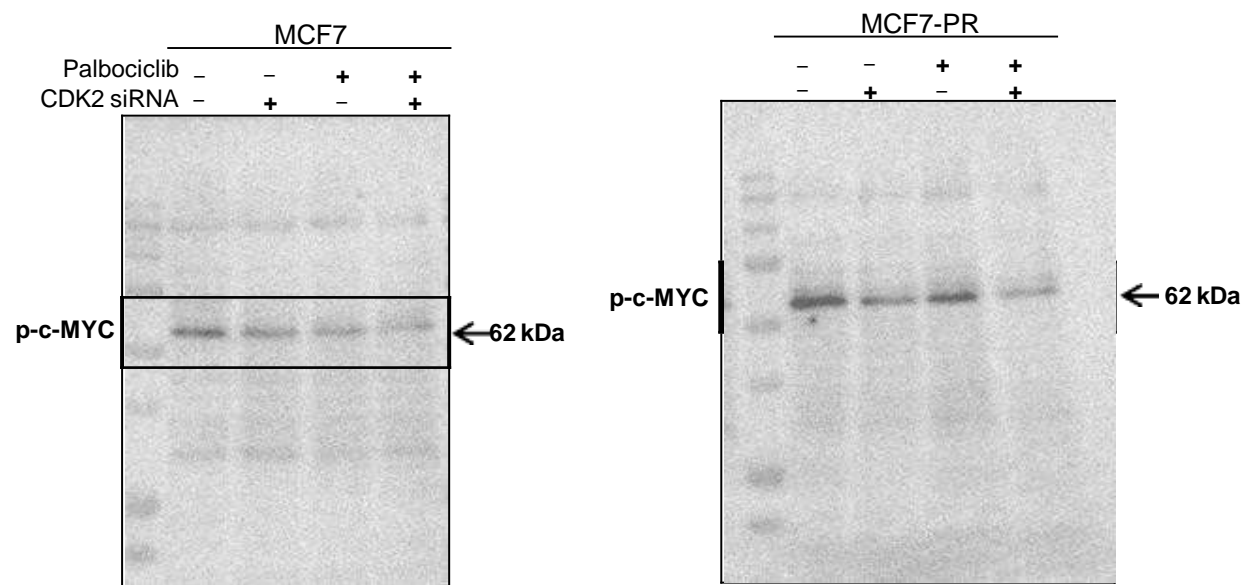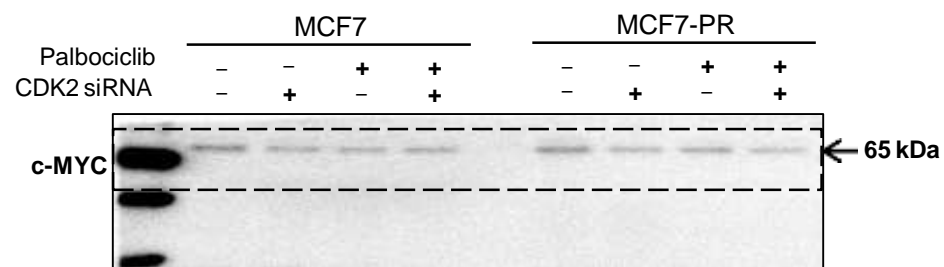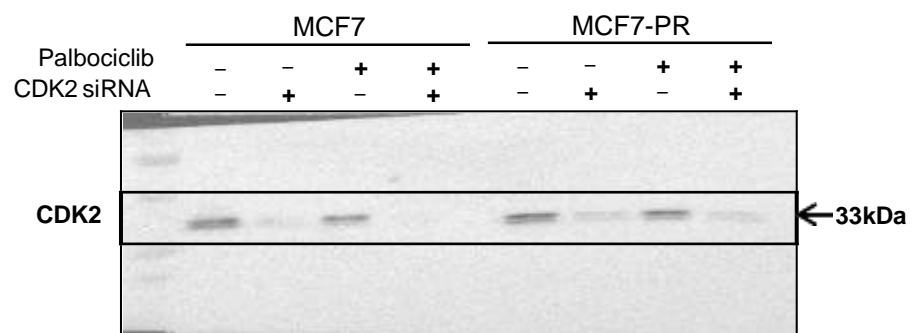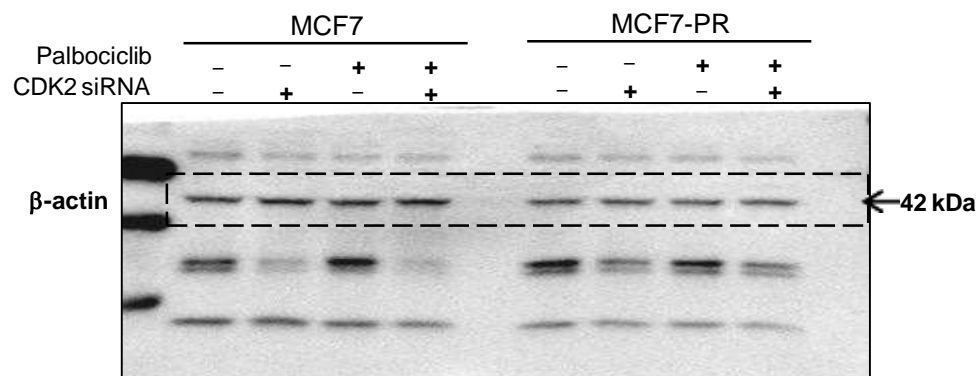

Figure6.

G.

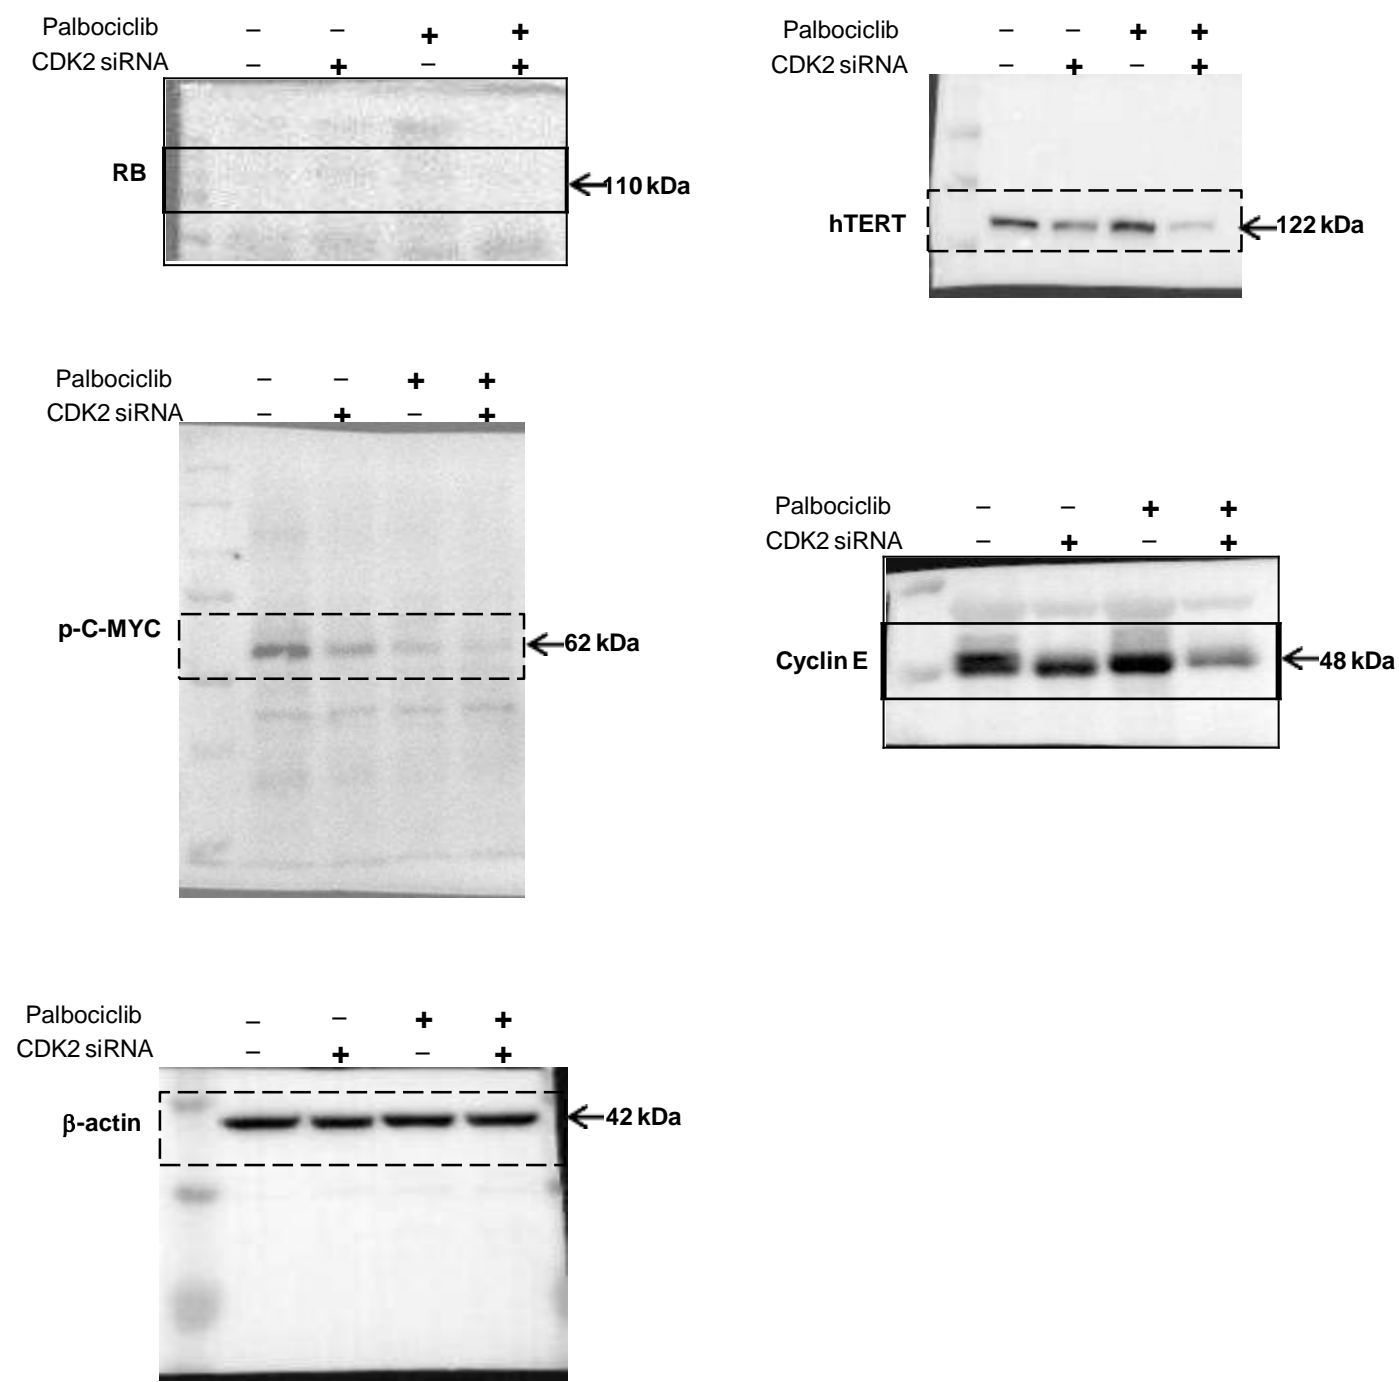

Figure6.  
H.

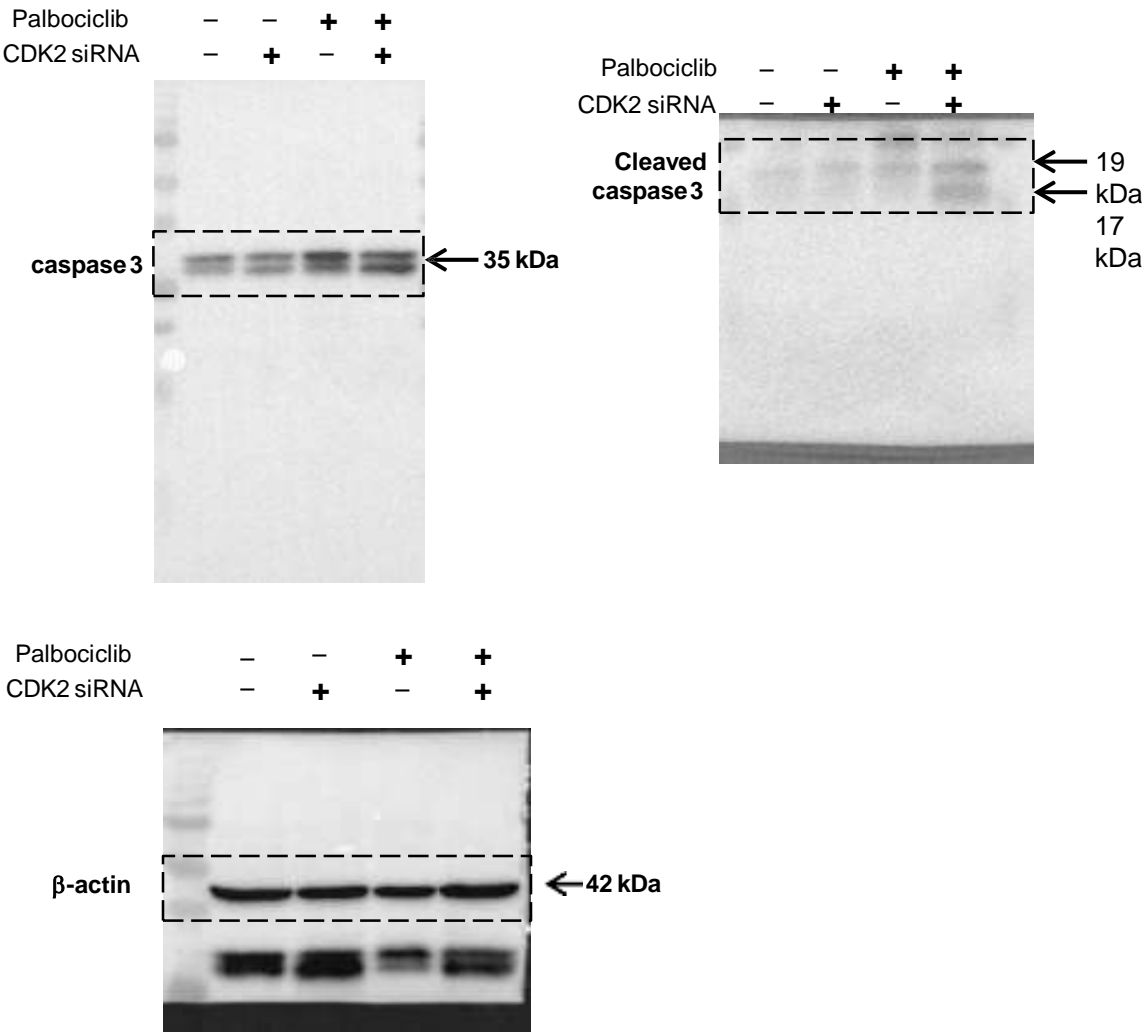

Figure 7

A.

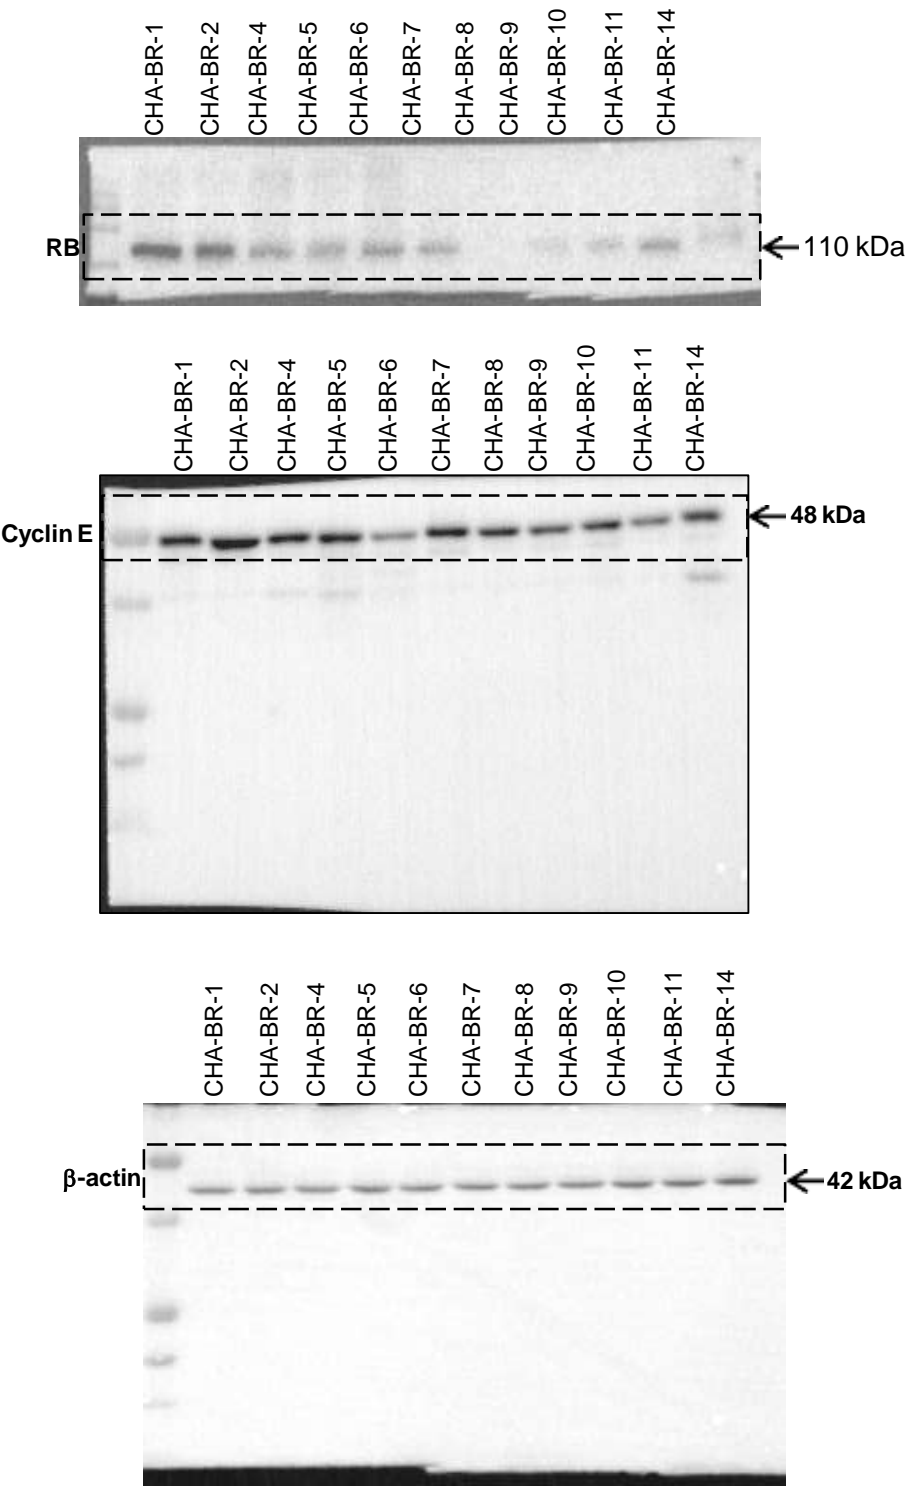

Supplementary Figure1

C.

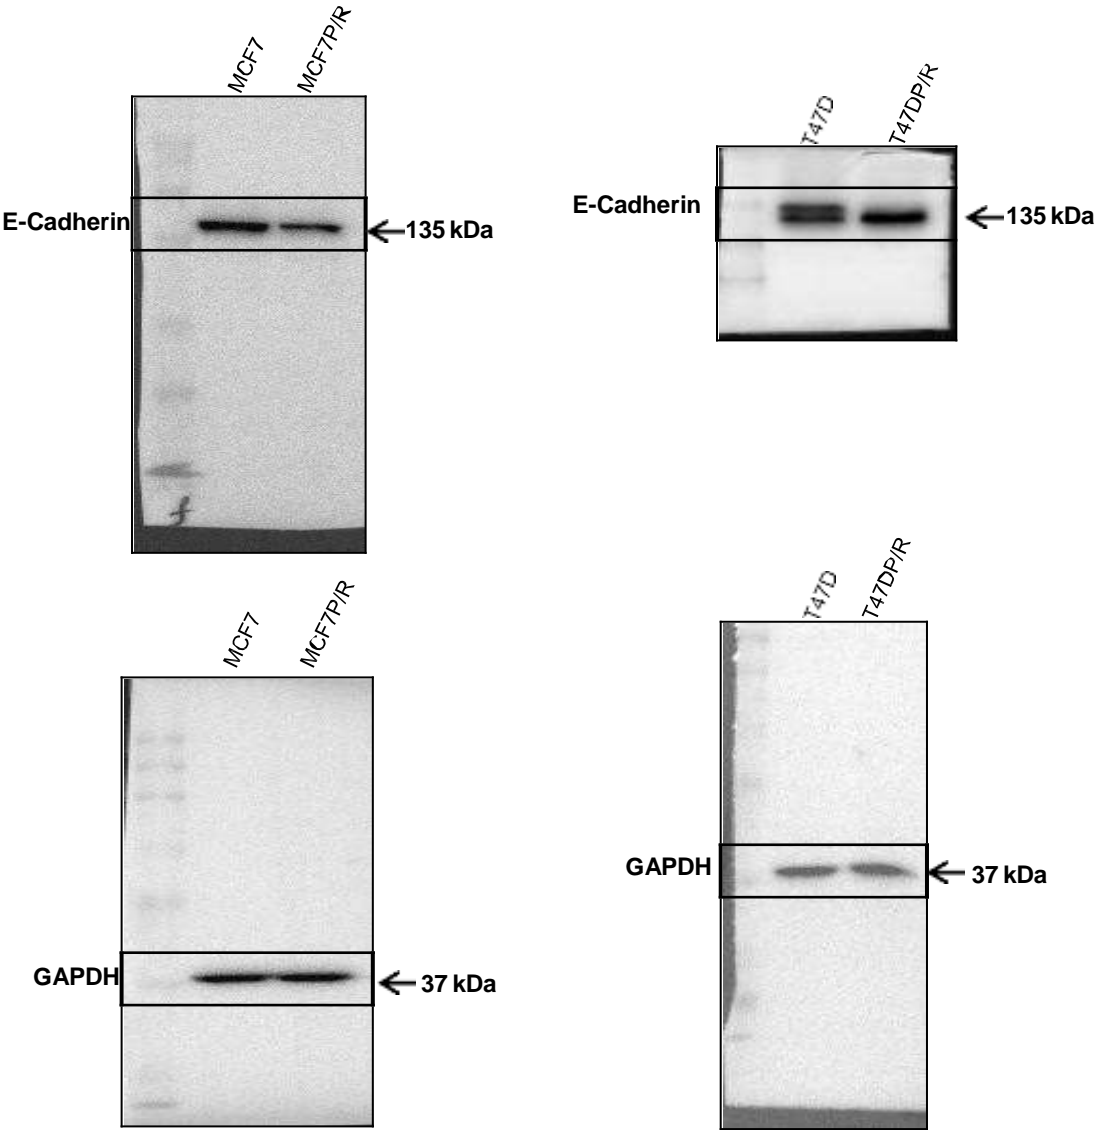

Supplementary Figure 3

MCF7-PR

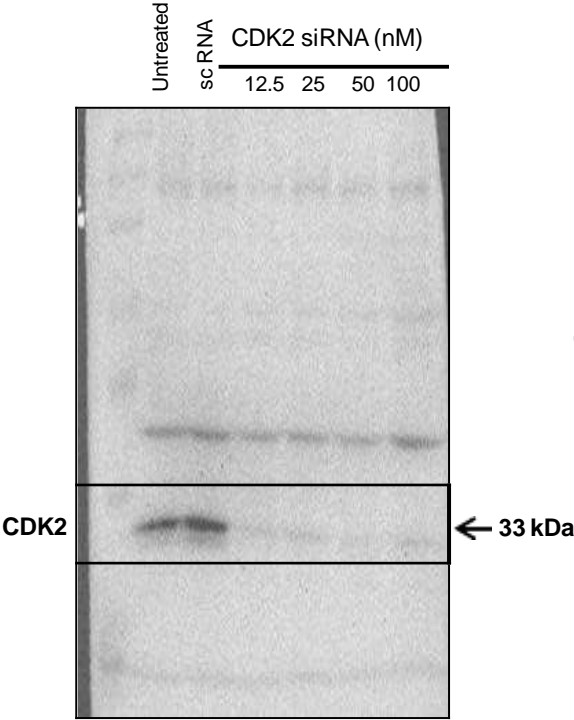

T47D-PR

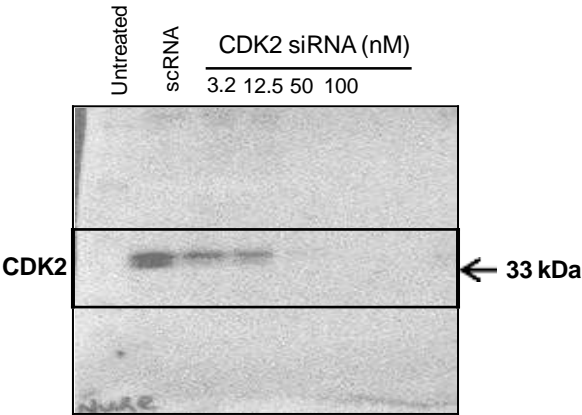

MCF7-PR

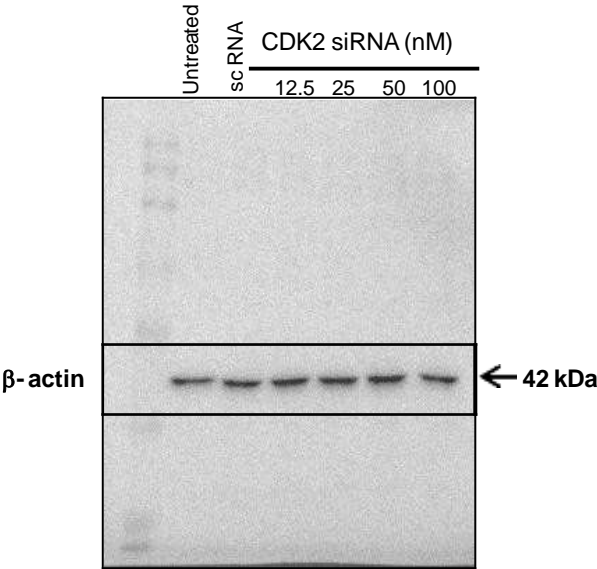



Supplementary Figure 4

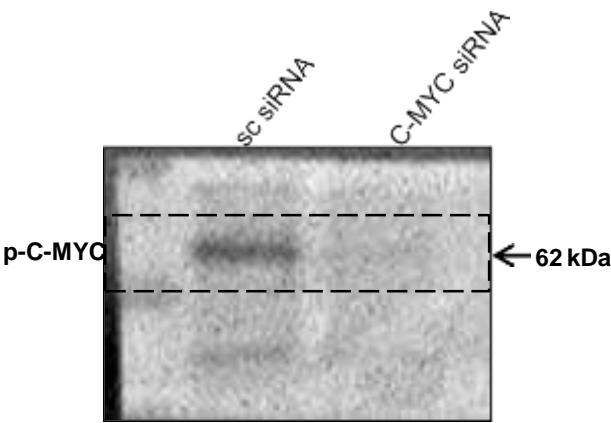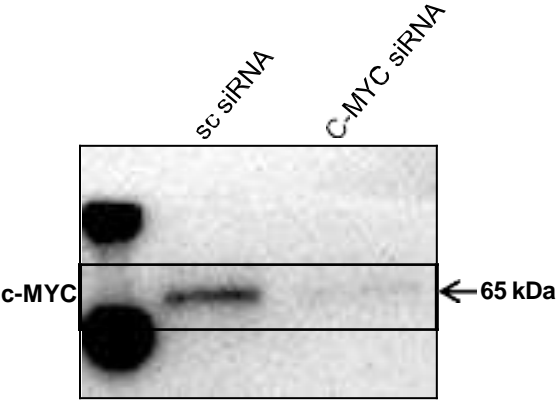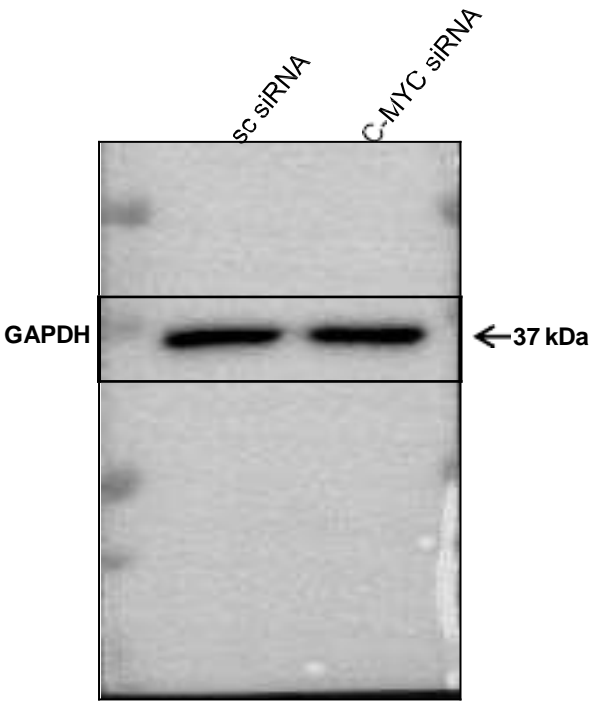

Supplement: s1 [file s1]
